1 **Prevalence of Methicillin-Resistant *Staphylococcus aureus* in Diabetic Patients Visiting the**  
2 **37-MilitaryHospital in the Accra Metropolis**

3 **Akosua Serwaa Boaitey-Biko<sup>a</sup>, Ishmael Bukari<sup>c</sup>, Isaac Ogbe<sup>b</sup>, Michael Acheampong**  
4 **Debrah<sup>a,b</sup> \***

5 <sup>a</sup>Department of Medical Laboratory Science, University of Ghana.

6 <sup>b</sup>Department of Biochemistry, Cell, and Molecular Biology, University of Ghana.

7 <sup>c</sup>Kwame Nkrumah University of Science and Technology

8 \*Corresponding author

9 Email: michdebrah@gmail.com

10

11

12

13

14

15

16

17 **Abstract**

18 Misuse of antibiotics contributes to the worldwide rise in antibiotic resistance. However, it is equally  
19 important to consider inevitable situations that may contribute to a rise in antibiotic resistance and  
20 implement best practices to ensure the minimality of their resulting adverse effects. A case in point is  
21 the increasing prevalence of methicillin-resistant *Staphylococcus aureus* (MRSA), a strain of  
22 bacterium that has developed resistance to the antibiotic methicillin and other lactams among long-  
23 term diabetic patients as observed in this study. Diabetes is associated with immunosuppression and  
24 foot ulcers, which require the constant use of antibiotics as prophylactics, as such, persons with this  
25 condition would hold bacterial populations subject to immense selective pressure and are therefore at  
26 increased risk for MRSA colonization. Furthermore, these individuals may serve as reservoirs and  
27 disseminate these highly drug-resistant strains on return to the general populace. This warranted an  
28 investigation into the prevalence of MRSA among diabetic patients at the 37-Military Hospital. A  
29 total of 50 samples were taken from the sampled Military Hospital by swabbing the participants' skin,  
30 nose, and wounds aseptically, and 20 samples were acquired from non-diabetics to serve as controls.  
31 To culture the samples, blood, and mannitol salt agar were used. Bacteria were isolated and identified  
32 using Gram staining and other biochemical testing. The Kirby-Bauer disc diffusion method was used  
33 with Muller-Hinton agar to test for antimicrobial susceptibility. According to the study's findings,  
34 antibiotic resistance was much higher among diabetic patients than among non-diabetic patients at  
35 the 37-Military Hospital in the Accra Metropolis, Ghana.

36

## 37 **Introduction**

38 The incidence of diabetes mellitus (DM), a chronic metabolic disorder characterized by elevated  
39 blood sugar levels, has reached epidemic proportions worldwide including Ghana (1,2). The presence  
40 of diabetes lowers the immune system, which increases the body's susceptibility to infections (3).  
41 Among people with diabetes, methicillin-resistant *Staphylococcus aureus* (MRSA) is a leading cause  
42 of various infections, including skin, soft tissue, the urinary tract, heart, and blood vessels (4–6)  
43 MRSA is a distinctly evolved strain of the bacterium *Staphylococcus aureus* that has developed  
44 resistance to multiple antibiotics, including methicillin, beta-lactam antibiotics, and cephalosporins,  
45 greatly increasing the recalcitrance of their associated infections (7–9). Also, studies have shown that  
46 diabetic individuals are more susceptible to MRSA colonization and infection than other patient  
47 populations during hospital admission (10–14).

48 Except in cases of severely advanced DM or following a surgical procedure, in Ghana, most diabetic  
49 cases are handled as outpatient; where individuals visit hospital clinics for tests and treatment without  
50 a need for a hospital stay. This method of patient management without proper monitoring mechanisms  
51 would not only put diabetic patients at increased risk of infection leading to complications but also  
52 position diabetic individuals as vectors for these drug-resistant pathogens into the general populace  
53 on return to their homes and daily activities.

54 Thus, it is essential to gain an understanding of the incidence of MRSA in the diabetic patient  
55 population at major hospitals as well as the risk factors associated with the infection, to direct  
56 infection control efforts and improve patient outcomes in Ghana. This study focuses on the 37-  
57 Military Hospital, and aims to contribute significantly toward advancing patient care, the creation of  
58 targeted interventions, enhanced infection control strategies, and appropriate antibiotic prescribing

59 practices, all of which are intended to minimize the spread of MRSA infections and their impact on  
60 this vulnerable group within the Accra Metropolitan Area.

## 61 **Results**

### 62 **Demographic Characteristics**

63 According to the results of the study, the average age of female diabetic patients was somewhat higher  
64 than that of male diabetic patients, with a range of 46-82 years for the former and 45-77 years for the  
65 latter. We also discovered that the median age of diabetic patients was 54 years old for men and 63  
66 years old for women. In addition, the 3 infants' ages ranged from 2 to 6, with the average being 4  
67 years.

### 68 **Bacterial Profile of Study Participants and Control**

69 Tables 1 & 2 show that *S. aureus* was the predominant bacterium isolated from both groups. We  
70 also found that the highest numbers of *S. aureus* isolates were found on the skin of diabetic patients,  
71 *S. aureus* was isolated from three different sites: the nose (30%), wounds (5%), and skin (65%)  
72 indicating that the skin might serve as a significant reservoir for this bacterium in diabetic  
73 individuals.

74 In the non-diabetic control group, *S. aureus* was found in the nose (33%) and wounds (67%), with no  
75 isolates detected from the skin. This suggests that *S. aureus* may be present in the nasal passages and  
76 wounds of non-diabetic individuals, but not as prevalent on their skin compared to diabetic patients.

77 In addition, it was revealed that *Pseudomonas aeruginosa* was present in both groups but at a lower  
78 percentage in diabetic patients (8%) compared to non-diabetic controls (14%).

79

80 **Differential Statistics between the Isolated *S. Aureus*, Age, Gender, and the Part of the Body**  
81 **from Which Sample Was Collected.**

82 From the data presented in Table 4, it is evident that there is a significant association between the  
83 prevalence of *S. aureus* and the age of the participants, with a p-value of 0.001. This suggests that the  
84 prevalence of *S. aureus* varies with different age groups, highlighting a potential age-related pattern  
85 in its occurrence. However, the association between *S. aureus* prevalence and gender was not  
86 significant, as evidenced by the p-value of 0.686. This means that there is no significant difference in  
87 the prevalence of *S. aureus* between males and females in the study population.

88 Another important finding is the significant association between the isolated *S. aureus* and the part of  
89 the body from which the sample was collected, with a p-value of 0.001. This indicates that *S. aureus*  
90 colonization differs depending on the location of the sample. In particular, the higher prevalence of  
91 *S. aureus* on the skin of diabetic patients may be reflected in this association.

92 **Percentage Distribution of Isolated MRSA**

93 Figures 1 and 2 highlight that MRSA is more dominant than sensitive *S. aureus* within diabetic  
94 patients, for which an opposite trend is observed in non-diabetic patients. Furthermore, in the diabetic  
95 patient group, all 6 cases (100%) of *S. aureus* isolated from the nose were identified as MRSA.  
96 Additionally, of the 16 MRSA cases among diabetic patients, the majority, 10 cases (62.5%), were  
97 isolated from the skin, while 6 cases (37.5%) were isolated from the nose. Notably, no MRSA was  
98 obtained from the wounds of diabetic participants. This data highlights that MRSA is particularly  
99 common in the nasal passages and skin of diabetic patients.

100 In the control group, 2 out of 6 cases (33%) of *S. aureus* isolated from the nose were identified as  
101 MRSA. Similarly, 1 case (16.5%) each was isolated from the wound and nose of participants in the  
102 control group were MRSA.

### 103 **Percentage Distribution of Antibiotic Susceptibility Profile of Isolated *S. Aureus*.**

104 In the diabetic patient group, the *S. aureus* isolates showed high resistance to penicillin (100%),  
105 erythromycin (85%), and trimethoprim-sulfamethoxazole (85%). They also displayed considerable  
106 resistance to ceftazidime (80%), gentamicin (60%), and clindamycin (60%). However, there was  
107 relatively low resistance to vancomycin (30%) and tetracycline (20%). The most effective antibiotic  
108 was linezolid, with a high sensitivity rate of 85%, and no resistance was observed against it. There  
109 were also 4 cases (20%) of intermediate susceptibility to ceftazidime among the *S. aureus* isolates from  
110 diabetic patients.

111 In the non-diabetic control group, *S. aureus* isolates showed high resistance to penicillin (100%) and  
112 tetracycline (67%) and moderate resistance to trimethoprim-sulfamethoxazole (50%). However, the  
113 highest sensitivity was observed for linezolid, with all isolates showing susceptibility (100%).

114 Overall, these results indicate that the isolated *S. aureus* strains from diabetic patients exhibited  
115 significant resistance to multiple commonly used antibiotics, posing challenges in treating infections  
116 caused by these strains. Linezolid appeared to be the most effective antibiotic for diabetic patients  
117 and non-diabetic controls. This information is provided in Figures 3 and 4, together with Table 5,  
118 showing the breakpoints for antibiotic susceptibility testing, interpreting the results in the context of  
119 standard guidelines and assist clinicians in making informed decisions about appropriate antibiotic  
120 therapy for MRSA infections.

121

### 122 **Percentage Distribution of Antibiotic Susceptibility Profile of Isolated MRSA**

123 From the data presented in Figures 5 and 6, along with the information in Table 5, within the diabetic  
124 patient group, the MRSA isolates exhibited high resistance to penicillin (100%) and trimethoprim-  
125 sulfamethoxazole (100%). They also showed considerable resistance to erythromycin (93.75%) and

126 gentamicin (75%). However, there was a relatively low level of resistance to linezolid (6.25%),  
127 making it one of the most effective antibiotics against MRSA in this group. Interestingly, there were  
128 11 cases (68.75%) of MRSA isolates with intermediate sensitivity to vancomycin, suggesting some  
129 degree of reduced susceptibility to this last-resort antibiotic.

130 Overall, the data indicates significant antibiotic resistance among the MRSA isolates from diabetic  
131 patients and non-diabetic controls.

### 132 **Discussion**

133 From the results, we highlight that the increasing prevalence of MRSA potentially represents a strain-  
134 level variation which has been shown in research by Kalan *et al* to be associated with poor clinical  
135 outcomes in diabetic patients (15). Although the MRSA prevalence is more prominent in diabetic  
136 patients, the lack of competing bacteria within the non-diabetic patients presents a significant risk of  
137 a potential epidemic. These findings emphasize the importance of monitoring and controlling MRSA  
138 colonization in diabetic patients to reduce the risk of potential infections and improve overall patient  
139 outcomes.

140 Also, the presence of *Proteus* spp and Coliform which were exclusively isolated from the diabetic  
141 patient group are of interest as previous research by Kalan *et al* has shown that non-pathogenic  
142 bacteria may contribute to accelerated wound healing but in some other cases may contribute to  
143 exacerbated inflammation through the presentation of superantigens and non-specific stimulation of  
144 T-cell populations (15). Further analysis of these bacterial isolates may provide valuable insights into  
145 their role in clinical outcomes for diabetic patients and non-diabetic controls, potentially aiding in  
146 understanding the link between bacterial infections and diabetes.

147 Looking at the antibiograms of the MRSA strains, an observable interesting pattern is that despite the  
148 uniformity displayed by the strains in their extreme sensitivity to linezolid as well as resistance to

149 penicillin and tetracycline across both patient categories (control and diabetic) a significant increase  
150 in resistance is presented in specific antibiotics (Clindamycin, Erythromycin, Gentamycin and  
151 Trimethoprim-sulfamethoxazole) within the diabetic patient group as compared to the control group.  
152 A study by Anafo, R. B., *et al* in 2021 reported similar resistance levels for penicillin (91%-95%) but  
153 generally lower resistance levels for other antibiotics (16). Also, the sensitivity to linezolid is reflected  
154 in their results suggesting that the significant increase in resistance within the diabetic patient group  
155 as compared to the control group in our results may represent a reflection of an environment  
156 supporting increased evolutionary pressure driving the generation of highly multi-drug resistant  
157 strains which may go beyond drug pressure selection. Identifying any other potential contributors if  
158 present would be critical to controlling the emergence of epidemic strains in the future.

159 The presence of a pre-existing resistant population or a significant intermediately resistant population  
160 within these specific antibiotics displaying an increased resistance profile as you move from the  
161 control group to the diabetic group lends weight to a transitional theory in which sensitive strains  
162 become intermediately resistant before acquiring full resistance. However, the profile of clindamycin  
163 appears to deviate from this trend in that, although no intermediately resistant population is observed  
164 within the control group, a significant population of highly resistant strains is observed in the diabetic  
165 patient group. Similarly, by convention of a transitional theory to the generation of a highly resistant  
166 population, we would expect a significant percentage of strains responding in a resistant manner to  
167 vancomycin within the diabetic patient group since all the strains tested within the control group were  
168 intermediate-resistant. The results, however, show that a percentage of the strains within the diabetic  
169 group are sensitive. These sensitive strains however may highlight that a shift to intermediate  
170 resistance across strains may not be 100% complete thus far. The presence of vancomycin-  
171 intermediate *Staphylococcus aureus* (VISA) has also been reported in over 50 cases with an overall



172 1.7% prevalence among approximately 23,000 strains (17). Since vancomycin has been the go-to  
173 antibiotic for treating MRSA infections for decades, this and other research suggest that this rising  
174 resistance is a problem (17,18). Nevertheless, the distribution of intermediately resistant MRSA to  
175 vancomycin indicates a need for close monitoring and control to prevent a shift toward high  
176 resistance.

177 A similar pattern is observed across the antibiograms of *S. aureus* in the control and diabetic patient  
178 groups. An increasing pattern of resistance as you transition from the control group to the diabetic  
179 group in the same manner across the same specific antibiotics (Clindamycin, Erythromycin,  
180 Gentamycin, and Trimethoprim-sulfamethoxazole) as in the case of the MRSA strains. These  
181 similarities highlight that factors contributing to the generation of resistant strains within diabetic  
182 patients may act uniformly across bacterial strains present.

183 Overall, the data points to a growing prevalence of highly resistant strains within diabetic patient  
184 groups as such, strategies including constant drug resistance surveillance, and antibiotic prescription  
185 control are needed if the current outpatient system of handling diabetic patients is to be maintained.

186

187

188

189

## 190 **Materials and Methods**

### 191 **Introduction**

192 This study investigated the bacterial profile and antimicrobial susceptibility of samples collected from  
193 diabetic patients and non-diabetic controls at the 37-Military Hospital. A total of 50 samples were  
194 aseptically collected from diabetic patients, including swabs from their skin, nostrils, and wounds.  
195 Additionally, 20 samples were obtained from non-diabetic individuals to serve as controls. The  
196 samples were cultured on blood and mannitol salt agar, and subsequent isolation and identification of  
197 bacteria were performed using Gram staining and other biochemical tests. The susceptibility of the  
198 isolated bacteria to antimicrobial agents was assessed using the disk diffusion method on Muller-  
199 Hinton agar.

### 200 **Sample Collection**

201 Participants for this study were recruited from the diabetic patient population at the 37-Military  
202 Hospital across several hospital sites: the Medical and Surgical Outpatient Department (SOPD),  
203 Female and Male Medical Ward, Surgical and Polyclinic Dressing Room, and Emergency Room.  
204 Written informed consent was obtained from each participant before sample collection. Aseptic  
205 techniques were employed during the collection of samples to minimize contamination. For diabetic  
206 patients, swabs were taken from their skin, nostrils, and any existing wounds. For the non-diabetic  
207 controls, swabs were taken from the skin and nostrils. The cotton tips of the swab sticks were broken  
208 into pre-labeled bijoux bottles containing 10 ml sterile peptone water and gently re-capped. The  
209 collected samples were carefully labeled and transported to the Microbiology Laboratory, School of  
210 Biomedical and Allied Health Sciences, College of Health Sciences, University of Ghana, Korle-Bu,  
211 for analysis.

212

## 213 **Analysis of the Samples**

214 All the media utilized in this investigation were sterilized (autoclaved at 121C for 15 minutes) and  
215 prepared following the manufacturer's instructions. Prepared media included Blood Agar (BA),  
216 Mannitol Salt Agar (MSA), MacConkey Agar (MA), and Muller Hinton Agar (MHA). All  
217 biochemical test media were produced per Oxoid, UK, manufacturer specifications, and each swab  
218 sample was streaked onto both blood and mannitol salt agar plates to promote the growth of a wide  
219 range of bacterial species. The plates were then incubated aerobically at 37°C for 48 h. After  
220 incubation, colony morphology, and Gram staining were used to identify the different bacterial  
221 species present in the samples. Further biochemical tests, including catalase, oxidase, and sugar  
222 fermentation tests, were conducted to confirm the bacterial identification and sorting.

## 223 **Antibiotic Susceptibility Testing**

224 The modified Kirby Bauer disk diffusion technique was employed. Two or three colonies were taken  
225 from each isolate and emulsified in 5 ml of sterile peptone water to achieve a turbidity of 0.5  
226 McFarland. The prepared inoculum was applied to the MHA using a sterile inoculating loop.  
227 Penicillin G (1 g), gentamycin (10 g), clindamycin (2 g), erythromycin (15 g), tetracycline (30 g),  
228 trimethoprim-sulfamethoxazole (25 g), linezolid (10 g), vancomycin (5 g), and cefoxitin (30 g)  
229 antibiotic discs were utilized on the MHA. The reference strain of MRSA was ATCC 29523, obtained  
230 from the American Type Culture Collection. For 24 hours, the plates were kept at 37 degrees Celsius.  
231 Vernier calipers were used to measure the sizes of the inhibitory zones in millimeters (mm). The  
232 antibiotic discs were used to test their efficacy against the bacterial isolates, and the average diameter  
233 of the zone of inhibition was calculated. The obtained results were compared to cutoffs established  
234 by the Clinical and Laboratory Standards Institute (CLSI, 2017).

235

## 236 **Statistical Analysis**

237 Data obtained from the antimicrobial susceptibility testing were analyzed using Microsoft Excel to  
238 assess the significance of differences between the bacterial profiles and susceptibility patterns of  
239 diabetic and non-diabetic controls. Descriptive statistics were used to summarize the data, and  
240 inferential statistics, such as t-tests or chi-square tests, were applied as appropriate. The results were  
241 then presented in tables and graphs to facilitate interpretation and discussion of the findings.

242

243 **List of Tables**

244 **Table 1:** Percentage distribution of bacteria isolated from the diabetic patients selected for the study.

| <b>Bacteria isolated</b>      | <b>Number</b> | <b>Percentage (%)</b> |
|-------------------------------|---------------|-----------------------|
| <i>Pseudomonas aeruginosa</i> | 2             | 8                     |
| <i>Proteus spp</i>            | 3             | 11                    |
| <i>Staphylococcus aureus</i>  | 20            | 77                    |
| Coliforms                     | 1             | 4                     |
| <b>Total</b>                  | <b>26</b>     | <b>100</b>            |

245

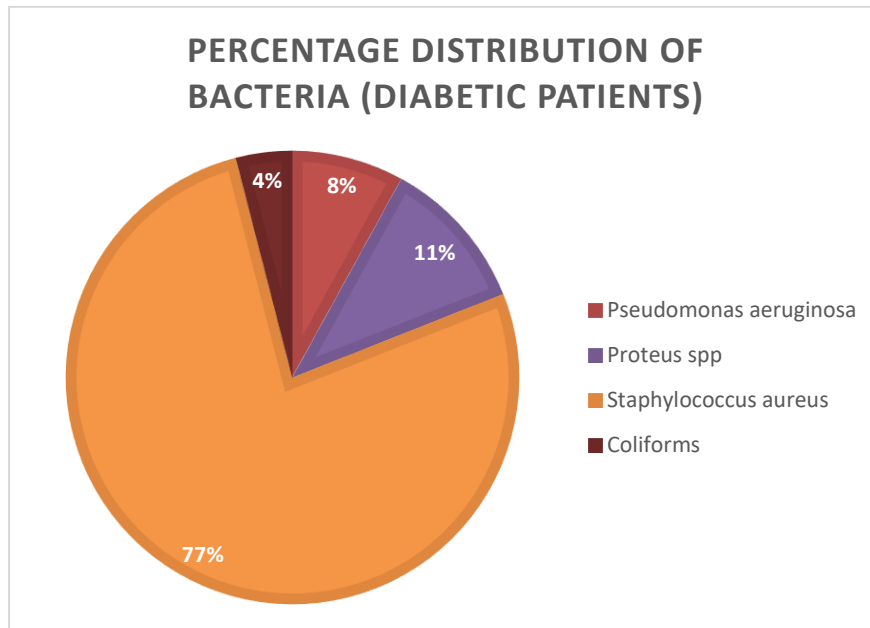

246

247

248

249

250

251

252

253

254 **Table 2:** Percentage distribution of the bacteria isolated from the healthy participants (controls)

| 255 | <b>Bacteria isolates</b> | <b>Number of isolates</b> | <b>Percentage (%)</b> |
|-----|--------------------------|---------------------------|-----------------------|
| 256 | Staphylococcus aureus    | 6                         | 86                    |
| 257 | Pseudomonas aeruginosa   | 1                         | 14                    |
| 258 | Total                    | 7                         | 100                   |

259

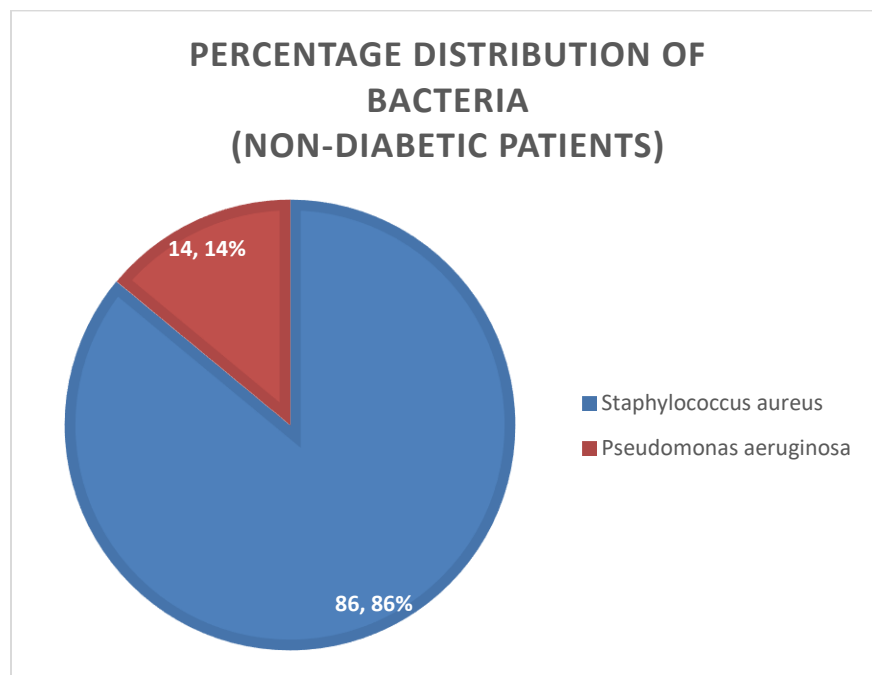

260

261

262

263

264

265

266 **Table 3:** Percentage distribution of *S. aureus* isolated from the various body sites of the study

267 participants in 37-Military Hospital, Accra.

268

269

| Parts of the body | Diabetic patients | percentage % | Control samples | %   |
|-------------------|-------------------|--------------|-----------------|-----|
| Nose              | 6                 | 30           | 2               | 33  |
| Wound             | 1                 | 5            | 4               | 67  |
| Skin              | 13                | 65           |                 |     |
| Total             | 20                | 100          | 6               | 100 |

270

271 **Table 4:** Association between the isolated *S. aureus*, age, gender, and the part of the body from  
272 which the sample was collected.

273

274

275

| Parameters | Organism         | P-value |
|------------|------------------|---------|
| Age        | <i>S. aureus</i> | 0.001   |
| Body part  | <i>S. aureus</i> | 0.001   |
| Gender     | <i>S. aureus</i> | 0.686   |

276

277

278

279

280

281

282

283

284 **Table 5:** The breakpoints of the antibiotic susceptibility profile as per CLSI 2017

| <b>Antibiotic</b>                       |                                       | <b>Disc content</b> | <b>Zone Diameter</b> |              |           |
|-----------------------------------------|---------------------------------------|---------------------|----------------------|--------------|-----------|
| <b>Class</b>                            | <b>Type</b>                           | <b>(µg)</b>         | <b>S≥</b>            | <b>I</b>     | <b>R≤</b> |
| <b>Penicillin</b>                       | <b>Penicillin G</b>                   | <b>1</b>            | <b>29</b>            |              | <b>28</b> |
| <b>Glycopeptide</b>                     | <b>Vancomycin</b>                     | <b>5</b>            | <b>14</b>            | <b>11-13</b> | <b>10</b> |
| <b>Aminoglycosides</b>                  | <b>Gentamycin</b>                     | <b>10</b>           | <b>15</b>            | <b>13-14</b> | <b>12</b> |
| <b>Macrolides</b>                       | <b>Erythromycin</b>                   | <b>15</b>           | <b>23</b>            | <b>14-22</b> | <b>13</b> |
| <b>Tetracyclines</b>                    | <b>Tetracycline</b>                   | <b>30</b>           | <b>19</b>            | <b>15-18</b> | <b>14</b> |
| <b>Lincosamides</b>                     | <b>Clindamycin</b>                    | <b>2</b>            | <b>21</b>            | <b>15-20</b> | <b>14</b> |
| <b>Folate Pathway Inhibitor</b>         | <b>Trimethoprim- Sulfamethoxazole</b> | <b>25</b>           | <b>16</b>            | <b>11-15</b> | <b>10</b> |
| <b>Oxazolidinones</b>                   | <b>Linezolid</b>                      | <b>10</b>           | <b>21</b>            |              | <b>20</b> |
| <b>Penicillinase-Stable Penicillins</b> | <b>Cefoxitin</b>                      | <b>30</b>           | <b>22</b>            |              | <b>21</b> |

285

286

287

288

289

290

291

292

293

294

295



296

297

298 **List of Figures**

299

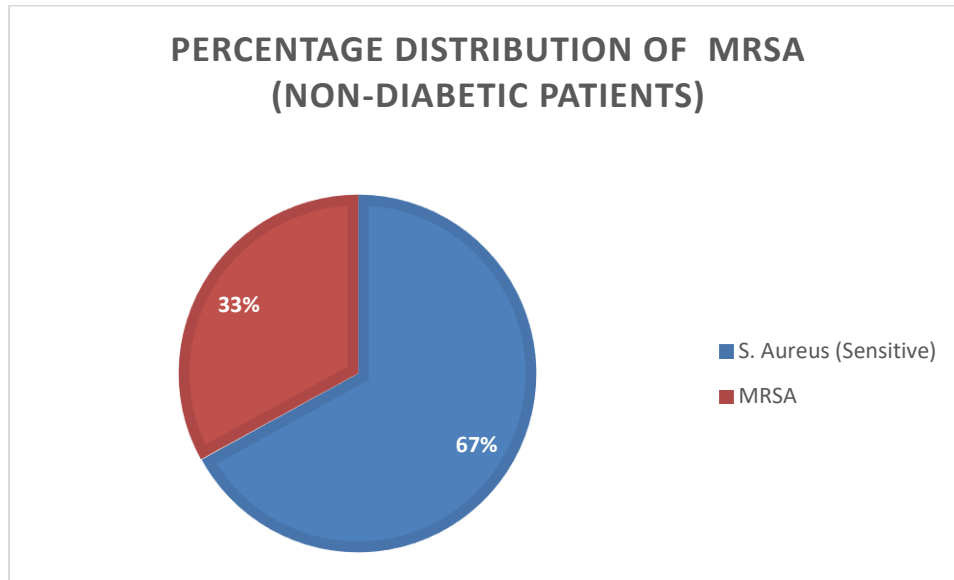

300

301

302 **Figure 1: Percentage Distribution of S. aureus and MRSA in non-diabetic patients.**

303

304

305

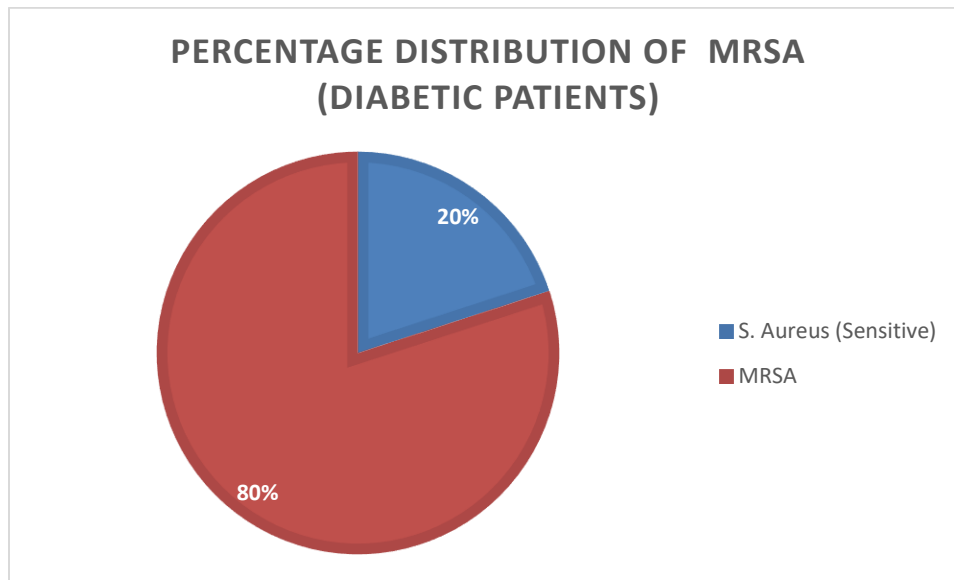

306

307

308 **Figure 2: Percentage Distribution of S. aureus and MRSA in diabetic patients.**

309

310

It is made available under a [CC-BY-ND 4.0 International license](https://creativecommons.org/licenses/by-nd/4.0/) .

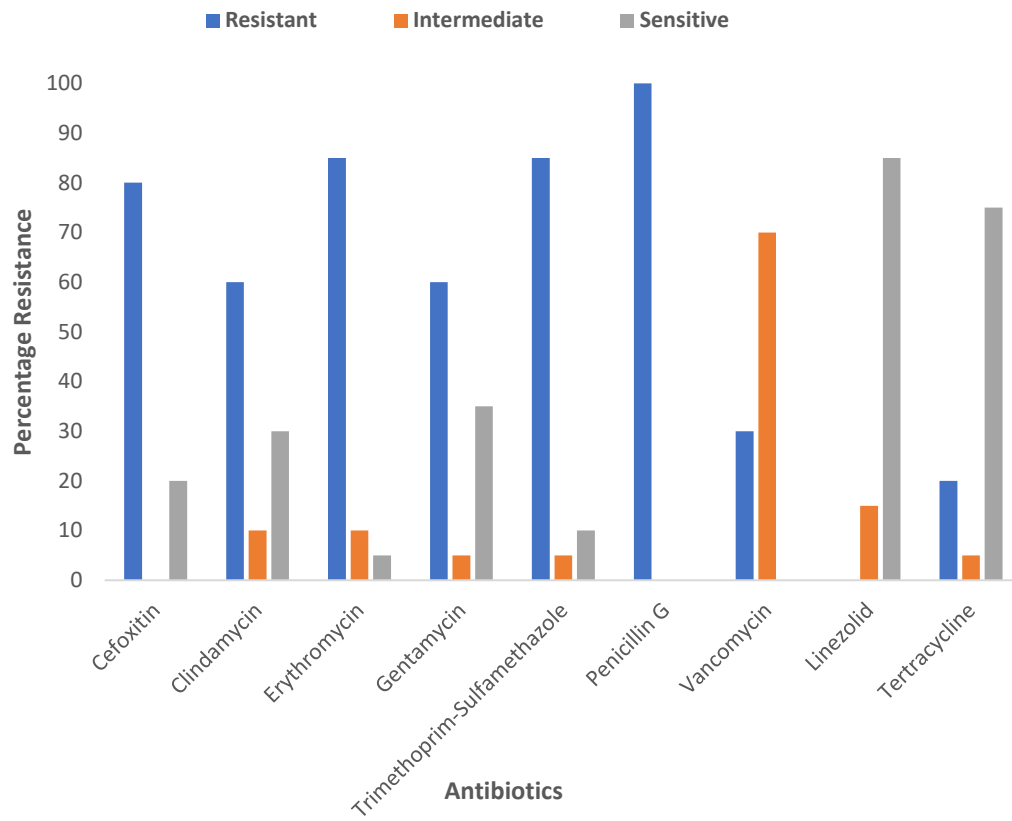

311

312 **Figure 3: Antibigram of isolated *S. aureus* from diabetic parents**

It is made available under a [CC-BY-ND 4.0 International license](https://creativecommons.org/licenses/by-nd/4.0/) .

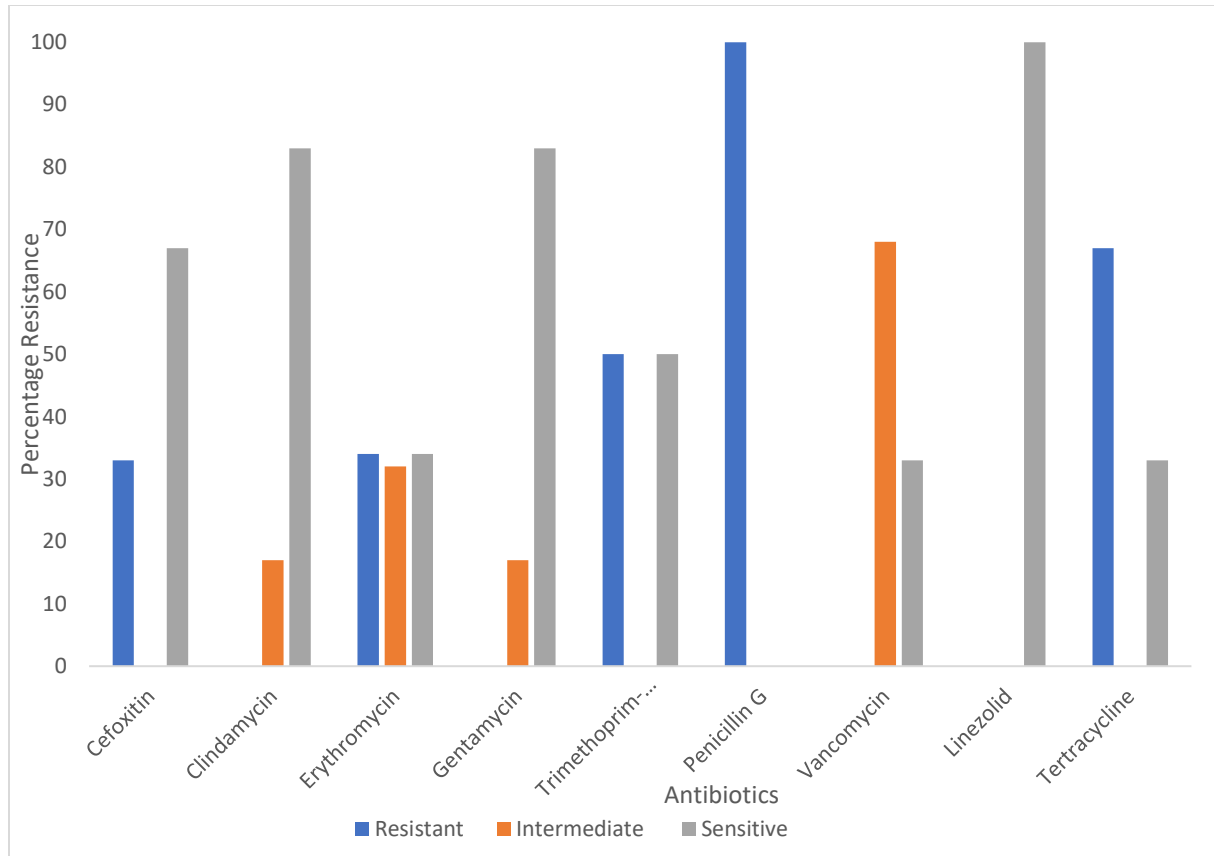

313

314 **Figure 4: Antibiogram of isolated *S. aureus* from control samples**

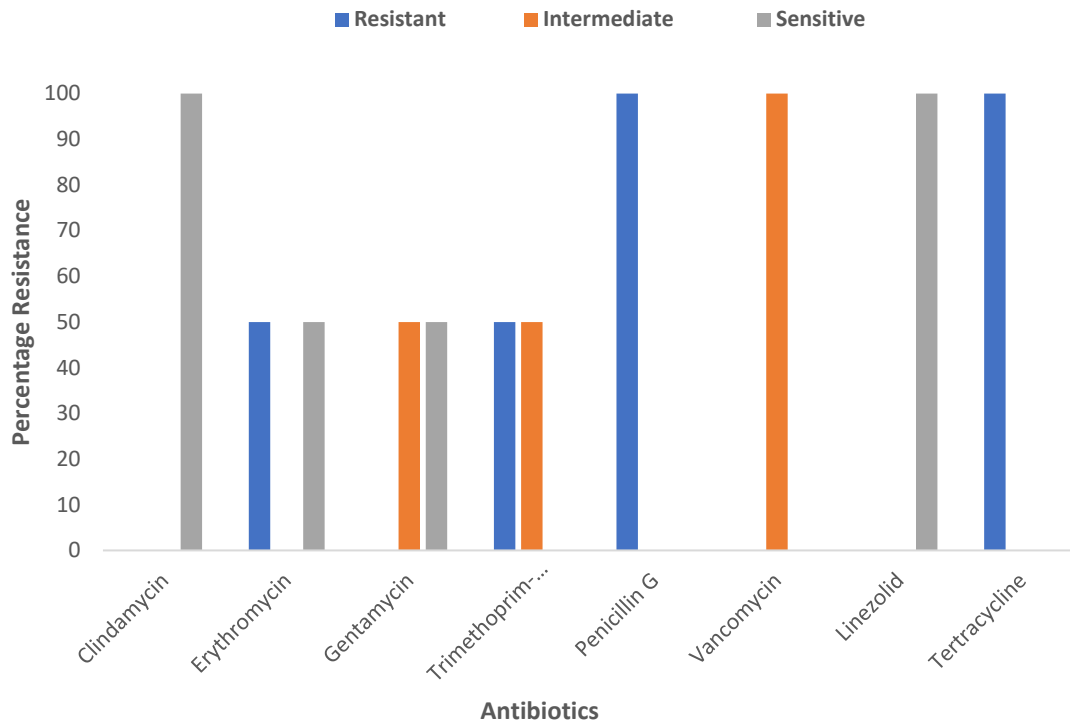

315

316 **Figure 5: Antibiogram of isolated MRSA from the control sample**

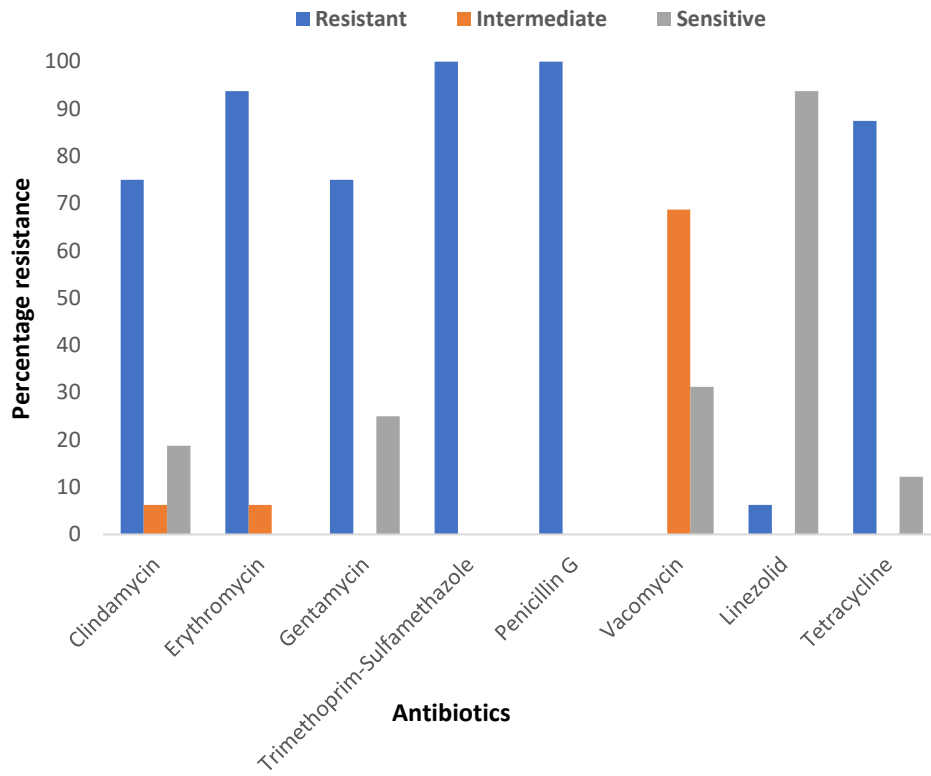

317

318 **Figure 6:** Antibiogram of isolated MRSA from diabetic patients

319

320

321

322

323

## 324 **References**

- 325 1. Amissah NA, Buultjens AH, Ablordey A, van Dam L, Opoku-Ware A, Baines SL, et al.  
326 Methicillin resistant *Staphylococcus aureus* transmission in a Ghanaian burn unit: The  
327 importance of active surveillance in resource-limited settings. *Front Microbiol.*  
328 2017;8(OCT):1–11.
- 329 2. Baines SL, Holt KE, Schultz MB, Seemann T, Howden BO, Jensen SO, et al. Convergent  
330 adaptation in the dominant global hospital clone ST239 of methicillin-resistant  
331 *Staphylococcus aureus*. *MBio.* 2015;6(2):1–9.
- 332 3. Berbudi A, Rahmadika N, Tjahjadi AI, Ruslami R. Type 2 Diabetes and its Impact on the  
333 Immune System. *Curr Diabetes Rev.* 2019;16(5):442–9.
- 334 4. Aaghar N, Aaghar M, Murntaz Shahina, Hussain Asif. Frequency of MRSA in patients  
335 presenting with recurrent skin infection in skin unit Hatyatabad Medical Complex  
336 Peshawar. *Kaohsiung J Med Sci.* 2016;9(3):316–9. Available from:  
337 [http://kjms.com.pk/sites/default/files/KJMS\\_6\\_0.pdf](http://kjms.com.pk/sites/default/files/KJMS_6_0.pdf)
- 338 5. Claeys KC, Zasowski EJ, Lagnf AM, Levine DP, Davis SL, Rybak MJ. Novel application  
339 of published risk factors for methicillin-resistant *S. aureus* in acute bacterial skin and skin  
340 structure infections. *Int J Antimicrob Agents.* 2018;51(1):43–6. Available from:  
341 <https://doi.org/10.1016/j.ijantimicag.2017.05.015>
- 342 6. Lipsky BA, Tabak YP, Johannes RS, Vo L, Hyde L, Weigelt JA. Skin and soft tissue  
343 infections in hospitalised patients with diabetes: Culture isolates and risk factors  
344 associated with mortality, length of stay and cost. *Diabetologia.* 2010;53(5):914–23.
- 345 7. Bishburg E, Bishburg K. Minocycline-an old drug for a new century: emphasis on  
346 methicillin-resistant *Staphylococcus aureus* (MRSA) and *Acinetobacter baumannii*. *Int J*

- 347 Antimicrob Agents. 2009;34(5):395–401.
- 348 8. Chang VS, Dhaliwal DK, Raju L, Kowalski RP. Antibiotic resistance in the treatment of  
349 staphylococcus aureus Keratitis: A 20-year review. *Cornea*. 2015;34(6):698–703.
- 350 9. Hamilton SM, J. Andrew NA, Eun JC, Li B, Costa TM, Severin A, et al. crossm High-  
351 Level Resistance of Staphylococcus. *Am Soc Microbiol*. 2017;61(6):1–10.
- 352 10. Karikari AB, Frimpong E, Owusu-Ofori A. Methicillin-resistant Staphylococcus aureus  
353 among patients in a teaching hospital in Ghana. *Int J One Heal*. 2017;3:46–9.
- 354 11. Kurup R, Ansari AA. A study to identify bacteriological profile and other risk factors  
355 among diabetic and non-diabetic foot ulcer patients in a Guyanese hospital setting.  
356 *Diabetes Metab Syndr Clin Res Rev*. 2019;13(3):1871–6. Available from:  
357 <https://doi.org/10.1016/j.dsx.2019.04.024>
- 358 12. Reveles KR, Duhon BM, Moore RJ, Hand EO, Howell CK. Epidemiology of methicillin-  
359 resistant Staphylococcus aureus diabetic foot infections in a large academic hospital:  
360 Implications for antimicrobial stewardship. *PLoS One*. 2016;11(8):1–8.
- 361 13. Stacey HJ, Clements CS, Welburn SC, Jones JD. The prevalence of methicillin-resistant  
362 Staphylococcus aureus among diabetic patients: a meta-analysis. *Acta Diabetol*.  
363 2019;56(8):907–21. Available from: <http://dx.doi.org/10.1007/s00592-019-01301-0>
- 364 14. Stanaway S, Johnson D, Moulik P, Gill G. Methicillin-resistant Staphylococcus aureus  
365 (MRSA) isolation from diabetic foot ulcers correlates with nasal MRSA carriage. *Diabetes*  
366 *Res Clin Pract*. 2007;75(1):47–50.
- 367 15. Kalan LR, Meisel JS, Loesche MA, Horwinski J, Soaita I, Chen X, et al. Strain- and  
368 Species-Level Variation in the Microbiome of Diabetic Wounds Is Associated with  
369 Clinical Outcomes and Therapeutic Efficacy. *Cell Host Microbe*. 2019;25(5):641-655.e5.



- 370 Available from: <https://doi.org/10.1016/j.chom.2019.03.006>
- 371 16. Anafo RB, Atiase Y, Kotey FCN, Dayie NTKD, Tetteh-Quarcoo PB, Duodu S, et al.  
372 Methicillin-resistant *Staphylococcus aureus* (MRSA) nasal carriage among patients with  
373 diabetes at the Korle Bu Teaching Hospital. *PLoS One* [Internet]. 2021;16(9  
374 September):1–12. Available from: <http://dx.doi.org/10.1371/journal.pone.0257004>
- 375 17. Shariati A, Dadashi M, Moghadam MT, van Belkum A, Yaslianifard S, Darban-Sarokhalil  
376 D. Global prevalence and distribution of vancomycin resistant, vancomycin intermediate  
377 and heterogeneously vancomycin intermediate *Staphylococcus aureus* clinical isolates: a  
378 systematic review and meta-analysis. *Sci Rep*. 2020;10(1):1–16. Available from:  
379 <https://doi.org/10.1038/s41598-020-69058-z>
- 380 18. Baseri N, Najar-Peerayeh S, Bagheri Amiri F. Prevalence of vancomycin-intermediate  
381 *Staphylococcus aureus* among clinical isolates in Iran: A systematic review and meta-  
382 analysis. *J Glob Antimicrob Resist*. 2018;15:178–87. Available from:  
383 <https://doi.org/10.1016/j.jgar.2018.06.018>
- 384

385 **Supplementary Figures**

386 ***SF1*: The image of Antibiotic susceptibility testing of *S. aureus*.**

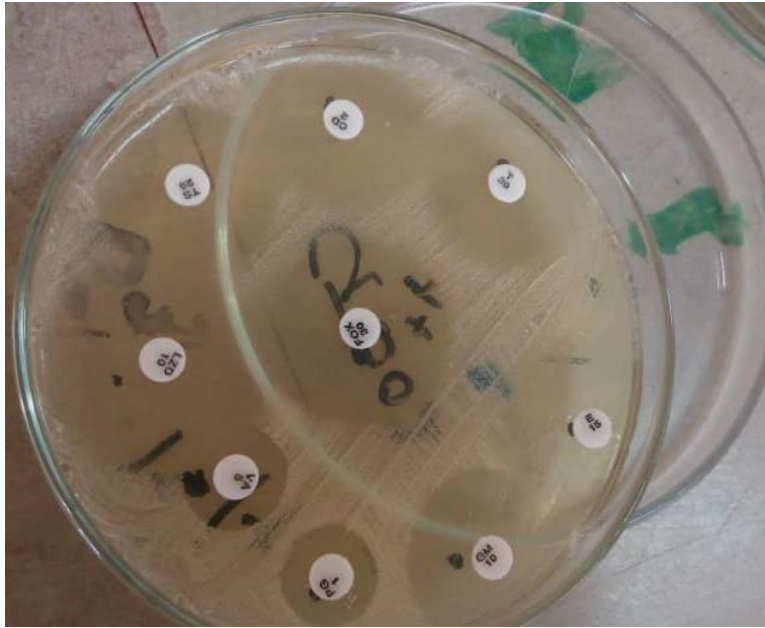

387

388

389 ***SF2*: Positive Coagulase test for *S. aureus***

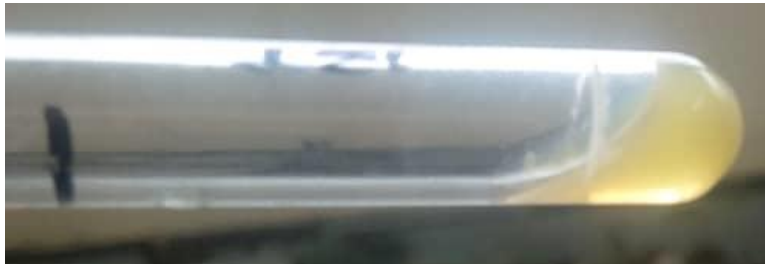

390

391

392

393

394

395

396

397

398 **SF3: Confirmation of *S. aureus* on Mannitol salt agar**

399

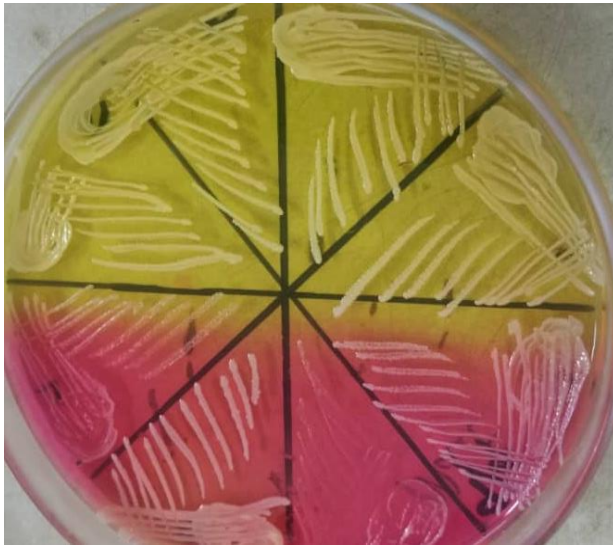

400

401

402 **SF4: Bacteria growth from direct inoculation of swab stick samples onto Mackonkey agar**

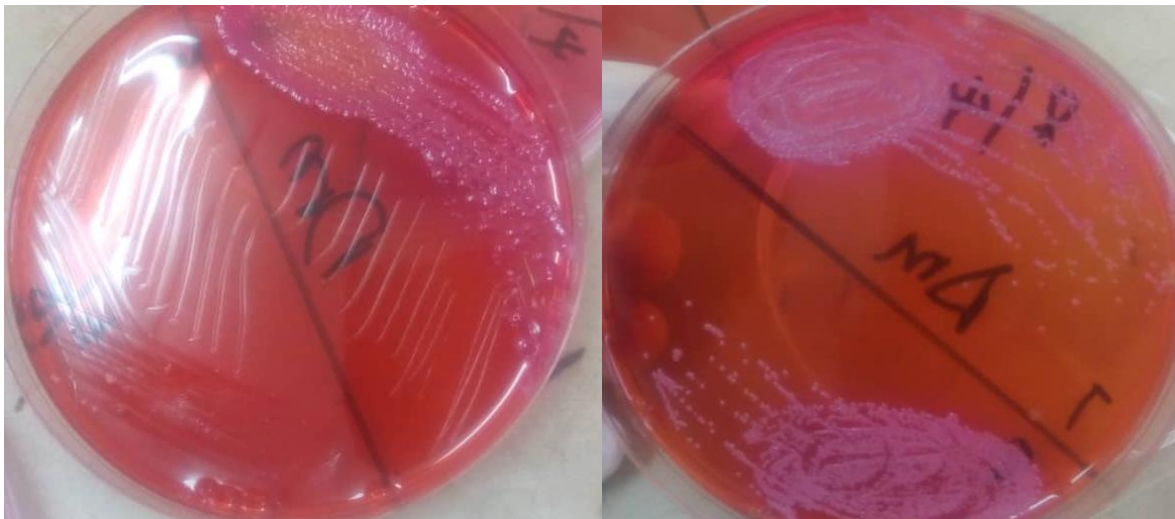

403
